# Supplementary material for: Spatial enhancer clustering and regulation of enhancer-proximal genes by cohesin
Source: HighWire-hosted journal article supplement (doi:10.1101/gr.184986.114), 2015-02-12
Supplement: Supp_Data.docx [file Supp_Data.docx]

GENOME/2014/184986-Revised

**Supplemental Data**

**Spatial enhancer clustering and regulation of enhancer-proximal genes by cohesin.**

Elizabeth Ing-Simmons, Vlad C. Seitan, Andre J. Faure, Paul Flicek, Thomas Carroll, Job Dekker, Amanda G Fisher, Boris Lenhard, Matthias Merkenschlager

**Supplemental Figure S1**. Impact of *Rad21* deletion on the association of other cohesin subunits with chromatin.

Western blotting was used to determine differences in SMC1A and SMC3 protein expression and chromatin association between control and *Rad21*-deleted thymocytes. Residual chromatin-associated SMC1A was 34% of control and residual chromatin-associated SMC3 was 32% of control after normalising to histone H3.

**Supplemental Figure S2. Super-enhancers in thymocytes**. Histone modifications and binding of Nipbl and the mediator subunit Med1 to thymocyte super-enhancers in thymocytes.

**Supplemental Figure S3. H3K4me1 and enhancer transcription are maintained in cohesin-deficient thymocytes**.

(*A*) ChIP-PCR was used to compare H3K4me1 histone modifications relative to total Histone H3 at selected enhancer elements in *Rad21*-deleted thymocytes: E: *Tcra* enhancer, *Satb1* enhancer 1*, Satb1* enhancer 2 and *Ubc* enhancer. The *Tinf2* promoter is a positive control.

(B) Intergenic transcription at conventional enhancers (left) and super-enhancers (right) is globally preserved in *Rad21*-deleted thymocytes.

**Supplemental Table S1. Differentially expressed genes presented by enhancer-association group (Data for Figure 1C).**

Of 17003 genes considered, 1153 were deregulated in cohesin-depleted thymocytes (450 down, 703 up), whereas 15850 genes were not significantly deregulated. Many of the deregulated genes were positioned near enhancers. Specifically, 300 of 1153 deregulated genes were nearest neighbours of conventional enhancers, 18 overlapped conventional enhancers, 207 were within 40kb of a super-enhancer, 137 were nearest neighbours of super-enhancers, and 119 overlapped a super-enhancer. In total, 504 (or 44%) of 1153 deregulated genes were characterised by proximity to enhancers by these criteria (227 down, 277 up). Note that the number 504 is smaller than the numerical sum of the groups because some genes are part of more than one group (e.g. the nearest neighbour of a super-enhancer will also be within 40 kb of the same or a different super-enhancer). In summary, of 1153 unique deregulated genes 504 (44%) were near enhancers, while 649 (56%) were not near enhancers.

| Group | Genes in group | Dereg. genes  in group | Down-reg. genes  in group | Up-reg. genes  in group | Non-dereg. genes in group | % dereg. genes in group |
| --- | --- | --- | --- | --- | --- | --- |
| Whole genome | 17003 | 1153 | 450 | 703 | 15850 | 7 |
| Nearest gene to enh. | 3080 | 300 | 115 | 185 | 2780 | 10 |
| Overlapping enh. | 144 | 18 | 7 | 11 | 126 | 12 |
| Within 40kb of SE | 1036 | 207 | 110 | 97 | 829 | 20 |
| Overlapping SE | 441 | 119 | 61 | 58 | 322 | 27 |
| Nearest gene to SE | 447 | 137 | 72 | 65 | 310 | 31 |

| Unique genes near enhancers | 504 (44%) | 227 | 277 | 649 (56%) |
| --- | --- | --- | --- | --- |

Supplemental Table 1. Differentially expressed genes presented by enhancer-association group (Data for Figure 1C).

| Interaction | Forward Primer | Reverse Primer |
| --- | --- | --- |
| A | AGGAGAACACCTGCCCAGAG | CAAATCAAGCTCTTCCCCACA |
| B | AGGAGAACACCTGCCCAGAG | AAGAGAACCCACTCCACCATGT |
| C | AGGAGAACACCTGCCCAGAG | GCTGAGAACCCCAAACAAGG |
| D | AGGAGAACACCTGCCCAGAG | CCAAACTGCCTTTCCCAATC |
| E | AGGAGAACACCTGCCCAGAG | CCGGGACTCAAGGAGTACGA |
| F | AGGAGAACACCTGCCCAGAG | GAGGGACCAAGGACCACAAG |
| G | AGGAGAACACCTGCCCAGAG | CATGATCCCCATCCCTGACT |
| H | AGGAGAACACCTGCCCAGAG | CACTGTTCTTGGCCATCAGG |
| I | CCAAACTGCCTTTCCCAATC | GAGGGACCAAGGACCACAAG |
| J | CCAAACTGCCTTTCCCAATC | CACTGTTCTTGGCCATCAGG |

Supplemental Table 2. Primers used for 3C experiments.

| Target | Forward Primer | Reverse Primer |
| --- | --- | --- |
| *Tcra Ea* | GTGATCCTCTCTGCCTGCAA | GGTCTCCTAAACCTGGGTAGGC |
| *Satb1* enh. 1 | ACGTGCCACCTGTGATTCTG | CACCATCGCCAATGATCTGT |
| *Satb1* enh. 2 | TAACAACACCCCCTGCCTTC | AGCCTCTGACCAAGGAGCTG |
| *Tinf2* prom. | GAGGGAAACGCAGGAGTACG | TACAGCTTGCAGGGGTGATG |
| *Ubc* enh. | GTTTTGCCACGGGTTAGCTC | ACACTGCGCCCTGTTTTTCT |

Supplemental Table 3. Primers used for ChIP-PCR experiments.

| **Data type** | **Cell type** | **Citation** | **GEO accession** |
| --- | --- | --- | --- |
| H3K27ac ChIP-seq | DP thymocytes | This study | GSE61428 |
| H3K27ac ChIP-seq | DP thymocytes *Rad21* KO | This study | GSE61428 |
| Smc1a ChIP-seq | DP thymocytes | This study | GSE61428 |
| Med1 ChIP-seq | DP thymocytes | Seitan et al., 2013 | GSE48763 |
| Nipbl ChIP-seq | DP thymocytes | Seitan et al., 2013 | GSE48763 |
| H3K4me2 ChIP-seq | DN3 and DP thymocytes | Zhang et al., 2012 | GSE31235 |
| CTCF ChIP-seq | DP thymocytes | Shih et al., 2012 | GSE41743 |
| H3K4me3 ChIP-seq | thymocytes | Shen et al., 2012 | GSE29184 |
| H3K4me1 ChIP-seq | thymocytes | Shen et al., 2012 | GSE29184 |
| CTCF ChIP-seq | ES cells | Stadler et al., 2011 | GSE30206 |
| CTCF ChIP-seq | pro-B cells | Lin et al., 2012 | GSE40173 |
| RNA-seq | DP thymocytes | Seitan et al., 2013 | GSE48763 |
| RNA-seq | DP thymocytes *Rad21* KO | Seitan et al., 2013 | GSE48763 |
| Hi-C | DP thymocytes | Seitan et al., 2013 | GSE48763 |
| Hi-C | DP thymocytes *Rad21* KO | Seitan et al., 2013 | GSE48763 |

Supplemental Table 4. Summary of Hi-C, RNA-seq and ChIP-seq data used.
