# Supplementary material for: Spatial enhancer clustering and regulation of enhancer-proximal genes by cohesin
Source: HighWire-hosted journal article supplement (doi:10.1101/gr.184986.114), 2015-02-12
Supplement: Supp_Legends.docx [file Supp_Legends.docx]

**Supplemental data files.**

Supplemental Figure S1. Impact of *Rad21* deletion on the association of other cohesin subunits with chromatin

Supplemental Figure S2. Super-enhancers in thymocytes.

Supplemental Figure S3. Super-enhancers in *Rad21*-deleted thymocytes.

Supplemental Table 1. Differentially expressed genes by enhancer-association group. Supplemental Table 2. Primers used for 3C experiments.

Primers used in ChIP-PCR experiments are listed in Supplemental Table 3.

Supplemental Table 4. Summary of Hi-C, RNA-seq and ChIP-seq data used.

Supplemental File 1. Code to produce figures for manuscript from processed data.
