# Supplementary figures and images for: Spatial enhancer clustering and regulation of enhancer-proximal genes by cohesin
Source: PubMed Central journal article supplement — Genome Res. 2015 Apr;25(4):504–13. doi: 10.1101/gr.184986.114 (PMC4381522; doi:10.1101/gr.184986.114), 2015-04

Thymocyte super-enhancers

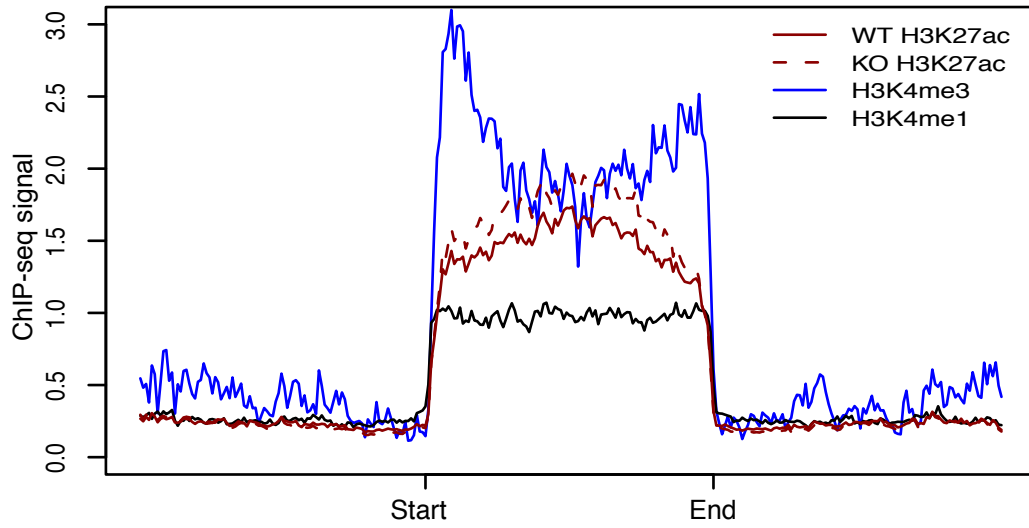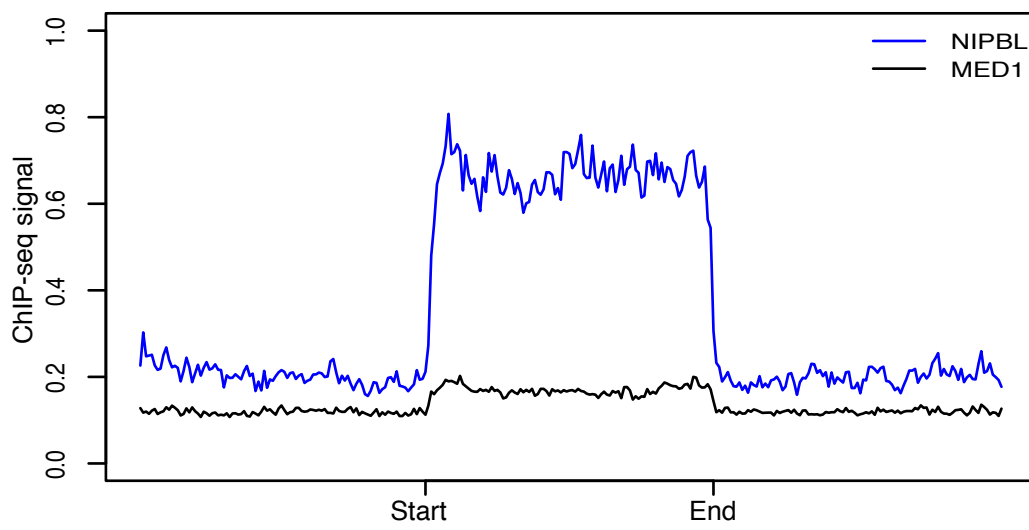

Supplement: supp_gr.184986.114_FigureS2.pdf [file supp_gr.184986.114_FigureS2.pdf]

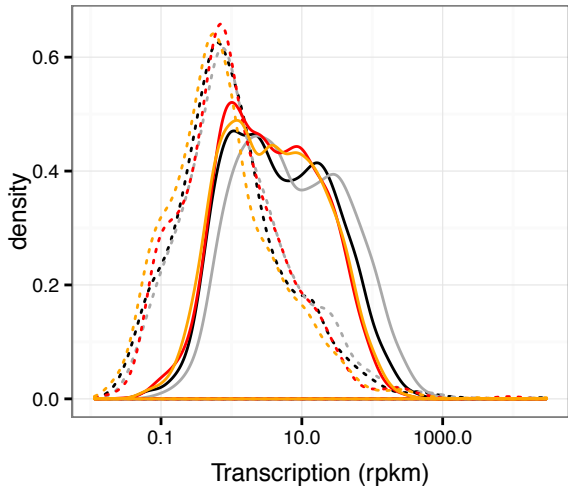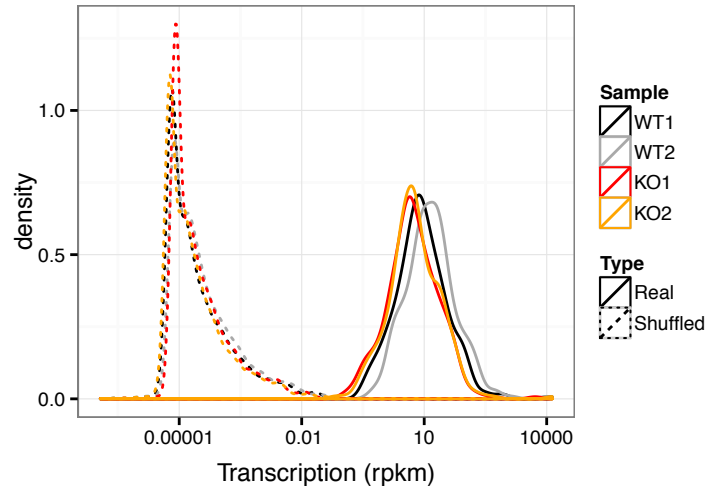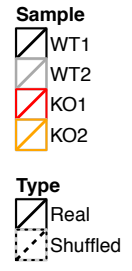

Supplement: supp_gr.184986.114_FigureS3.pdf [file supp_gr.184986.114_FigureS3.pdf]

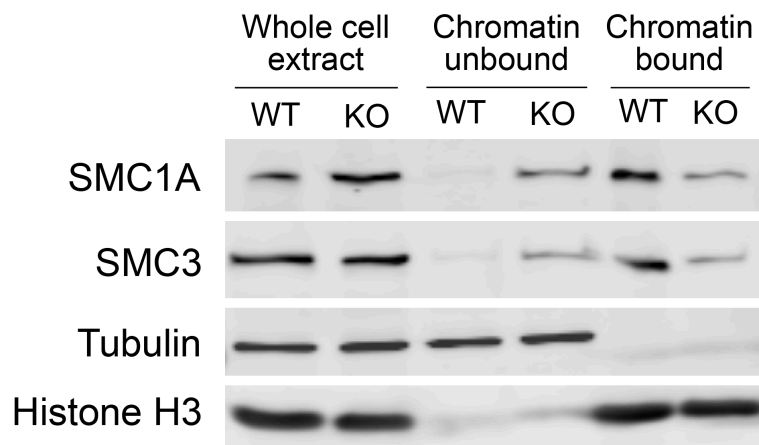

Supplemental Figure S1.

Supplement: supp_gr.184986.114_Figure_S1.pdf [file supp_gr.184986.114_Figure_S1.pdf]
